# Supplementary material
Source: HighWire-hosted journal article supplement (https://erj.ersjournals.com/content/54/5/1802166)
Supplement: inline-supplementary-material-1 [file inline-supplementary-material-1.pdf]

## Airway morphometry in COPD with bronchiectasis: a view on all airway generations

Stephanie Everaerts<sup>1,2</sup>, John E McDonough<sup>1</sup>, Stijn E Verleden<sup>1</sup>, Iván Josipovic<sup>3</sup>, Matthieu Boone<sup>3</sup>, Adriana Dubbeldam<sup>4</sup>, Carolien Mathyssen<sup>1</sup>, Jef Serré<sup>1</sup>, Lieven J Dupont<sup>1,2</sup>, Ghislaine Gayan-Ramirez<sup>1</sup>, Johnny Verschakelen<sup>4</sup>, James C Hogg<sup>5</sup>, Geert M Verleden<sup>1,2</sup>, Bart M Vanaudenaerde<sup>1</sup>, Wim Janssens<sup>1,2</sup>

<sup>1</sup>Laboratory of Pneumology, Department of Chronic Diseases, Metabolism & Aging (CHROMETA), KU Leuven, Leuven, Belgium

<sup>2</sup>Department of Respiratory Diseases, University Hospitals Leuven, Leuven, Belgium

<sup>3</sup>Department of Physics and Astronomy, UGCT, Radiation Physics, Ghent University, Gent, Belgium

<sup>4</sup>Department of Radiology, University Hospitals Leuven, Leuven, Belgium

<sup>5</sup>University of British Columbia James Hogg Research Centre, St. Paul's Hospital, Vancouver, BC, Canada

### Corresponding author:

Professor Wim Janssens, MD, PhD

University Hospitals Leuven, Department of Respiratory Diseases

Herestraat 49

B-3000 Leuven, Belgium

Phone: +32 16346812; Fax: +32 16346803

E-mail: [wim.janssens@uzleuven.be](mailto:wim.janssens@uzleuven.be)

### Summary 186/256:

Although terminal bronchioles were equally reduced in COPD lungs with and without bronchiectasis, significantly more large and small airways were found in COPD lungs with bronchiectasis.

Word count manuscript: 2890/3000

## DATA SUPPLEMENT

### **Materials and methods:** Air-dried whole-lobe microCT

These dried lobes were scanned with HECTOR, a custom designed microCT set-up developed at the Ghent University Centre for X-ray Tomography (UGCT) (25). The setup consisted of an open-type X-ray tube with directional target (X-RAY WorX, Garbsen, Germany) and a PerkinElmer amorphous-Si flat panel detector (2048x2048 pixels of  $200^2 \mu\text{m}^2$  each) with a CsI scintillator. The X-ray tube and flat panel detector were static, while the lobe was rotated over  $360^\circ$  and two thousand projection images were recorded. The tube was operated at 80keV and 200 $\mu\text{A}$  target current, and the reconstruction was performed with Octopus Reconstruction (XRE, Ghent, Belgium) (1) resulting in datasets of around  $2000 \times 2000 \times 1500$  voxels with a resolution of approximately  $140 \mu\text{m}$  (Figure 1B).

1. Vlassenbroeck J, Dierick M, Masschaele B, Cnudde V, Van Hoorebeke L, Jacobs P. Software tools for quantification of X-ray microtomography at the UGCT. Nucl Instrum Methods Phys Res A 2007;1:442-445.

**Figure E1:** Segmented airway models of all lobes

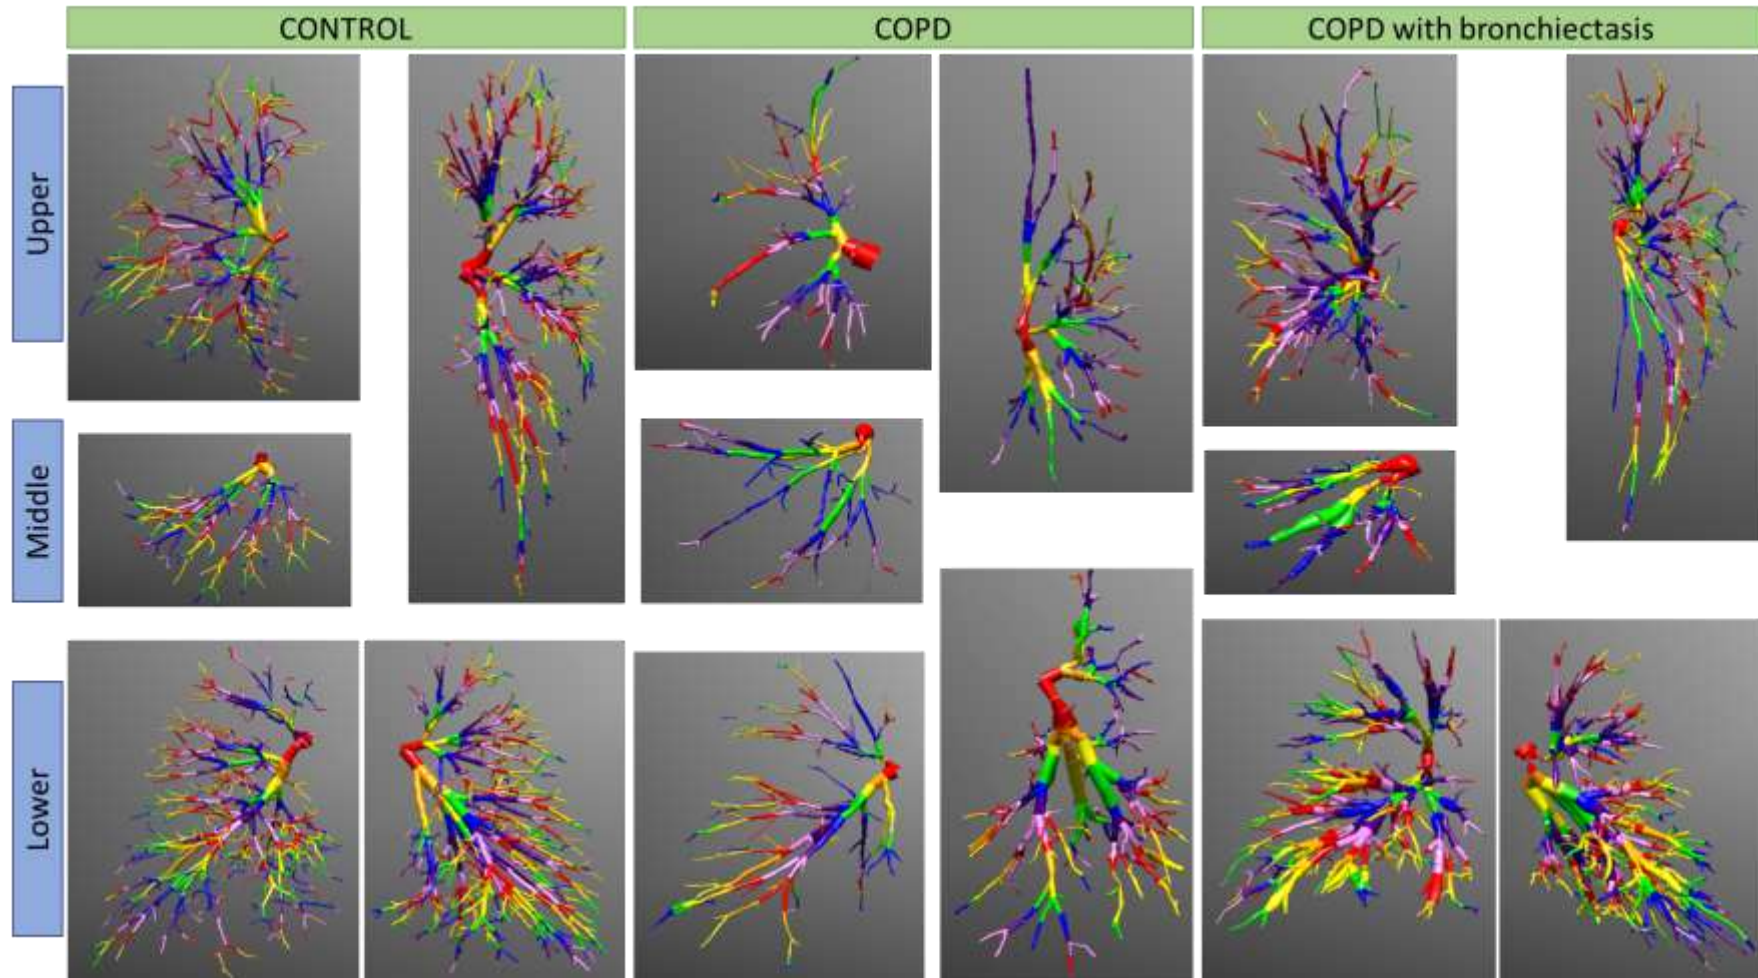

**Figure E2: MicroCT analysis of tissue cores**

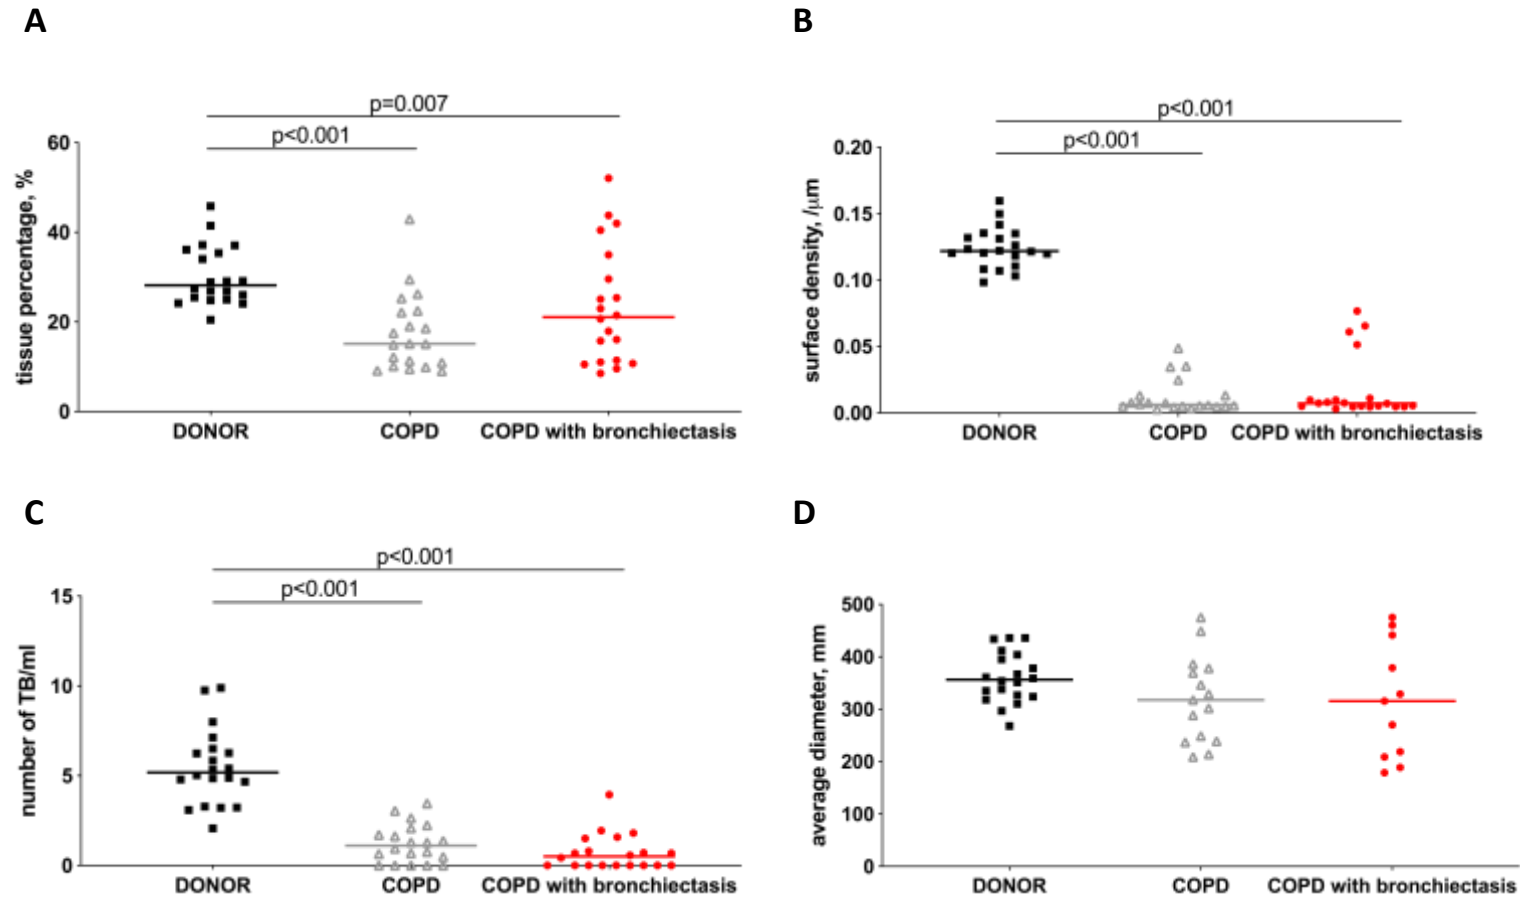

Results of measurements on images of tissue core microCT ( $n=4$  per lung, 5 lungs per group) of control lungs, COPD lungs and COPD lungs with bronchiectasis.

(A) Tissue percentage, (B) surface density, (C) number of terminal bronchioles per ml and (D) average diameter of visible terminal bronchioles.  $p$ -values were obtained by mixed models applied on individual core data with lung as random effect, comparing with the control group. The same model was performed for comparison of each group to COPD with bronchiectasis, no significant difference was found between COPD without versus with bronchiectasis.

**Table E1:** Cause of donor death and reason for lung decline

| Donor | Cause of death | Reason for rejection                                  |
|-------|----------------|-------------------------------------------------------|
| 1     | Cardiac arrest | Kidney tumor                                          |
| 2     | CVA            | Recipient died                                        |
| 3     | CVA            | Suspicion of beginning fibrosis in contralateral lung |
| 4     | CVA            | Emboli                                                |
| 5     | CVA            | Emboli                                                |
| 6     | CVA            | Suspicion of infection in contralateral lung          |
| 7     | CVA            | Emboli                                                |

CVA: cerebrovascular accident

**Table E2:** Results of tissue core microCT measurements

|                                  | COPD LUNGS |                      |                 | COPD LUNGS with BRONCHIECTASIS |                      |                 |
|----------------------------------|------------|----------------------|-----------------|--------------------------------|----------------------|-----------------|
|                                  | estimate   | lower-upper<br>limit | <i>p</i> -value | estimate                       | lower-upper<br>limit | <i>p</i> -value |
| Tissue percentage, %             | -11.32     | -17.33 - -5.30       | <0.001          | -8.70                          | -14.94 - -2.47       | 0.007           |
| Surface density, / $\mu\text{m}$ | -0.11      | -0.12 - -0.098       | <0.001          | -0.11                          | -0.12 - -0.10        | <0.001          |
| Visible TB, n/ml                 | -4.14      | -5.050 - -3.22       | <0.001          | -4.99                          | -5.93 - -4.046       | <0.001          |
| Diameter of TB, $\mu\text{m}$    | -34.75     | -87.70 - 18.20       | 0.19            | -58.63                         | -118.75 - 1.49       | 0.056           |

Results are presented as estimates with upper and lower limits. *p*-values were obtained by mixed models applied on individual core data with lung as random effect, comparing with the control group. The same model was performed for comparison to COPD with bronchiectasis, no significant difference was found between COPD without versus with bronchiectasis.

**Table E3:** MicroCT results of upper versus lower lobes and bronchiectatic versus non-bronchiectatic regions

|                                          | Upper lobe                       | Lower lobe                   | p-value |
|------------------------------------------|----------------------------------|------------------------------|---------|
| <b>CONTROL</b> cores, n                  | 15                               | 5                            |         |
| Tissue percentage, %                     | 26.88 (24.99 - 35.35)            | 29.13 (25.78 - 41.46)        | 0.43    |
| Surface density, / $\mu\text{m}$         | 0.12 (0.12 - 0.13)               | 0.12 (0.11 - 0.15)           | 0.93    |
| TB/ml, n                                 | 5.028 (3.28 - 6.27)              | 5.84 (3.94 - 8.88)           | 0.60    |
| <b>COPD</b> cores, n                     | 10                               | 10                           |         |
| Tissue percentage, %                     | 11.72 (9.80 - 18.66)             | 20.59 (13.73 - 26.33)        | 0.11    |
| Surface density, / $\mu\text{m}$         | 0.0053 (0.0041 - 0.012)          | 0.0077 (0.0056 - 0.019)      | 0.11    |
| TB/ml, n                                 | 0.38 (0 - 1.84)                  | 1.33 (0.67 - 2.22)           | 0.18    |
| <b>COPD with bronchiectasis</b> cores, n | 8                                | 12                           |         |
| Tissue percentage, %                     | 24.01 (20.87 - 49.54)            | 16.87 (10.82 - 32.58)        | 0.25    |
| Surface density, / $\mu\text{m}$         | 0.0079 (0.0060 - 0.048)          | 0.0052 (0.0046 - 0.041)      | 0.20    |
| TB/ml, n                                 | 0.28 (0 - 0.77)                  | 0.56 (0 - 1.57)              | 0.78    |
|                                          |                                  |                              |         |
|                                          | <b>Non-bronchiectatic region</b> | <b>Bronchiectatic region</b> |         |
| <b>COPD with bronchiectasis</b> cores, n | 10                               | 10                           |         |
| Tissue percentage, %                     | 24.01 (11.27 - 45.85)            | 20.83 (10.66 - 27.77)        | 0.49    |
| Surface density, / $\mu\text{m}$         | 0.0077 (0.0052 - 0.024)          | 0.0066 (0.0047 - 0.052)      | 0.68    |
| TB/ml, n                                 | 0 (0 - 0.82)                     | 0.097 (0.033 - 1.58)         | 0.088   |

Results are presented as n or median (Q1-Q3). P-values were obtained by Mann-Whitney test
